# Supplementary material for: Integrated Metabolomics-DNA Methylation Analysis Reveals Significant Long-Term Tissue-Dependent Directional Alterations in Aminoacyl-tRNA Biosynthesis in the Left Ventricle of the Heart and Hippocampus Following Proton Irradiation
Source: Front Mol Biosci. 2019 Sep 10;6:77. doi: 10.3389/fmolb.2019.00077 (PMC6746933; doi:10.3389/fmolb.2019.00077)
Supplement: Supplementary file 2 [file Table_2.xlsx]

## Sheet: Ventricle_Supp Table 2
Supplementary Table 2. Metabolites identified in left ventricular samples along with associated database information and raw data for each sample.
Metabolite	Found mass	Ret. Time	Formula	Molecular weight	Theoretical Mass	KEGG	CAS	CHEBI	HMDB_ID	METLIN_ID	Ion Mode	33 vent	35 vent	38 vent	40 vent	34 vent	36 vent	37 vent	39 vent	41 vent
ADENOSINE 3',5'-DIPHOSPHATE	428.035	5.6	C10H15N5O10P2	427.029	428.037	C00054	75431-54-8		HMDB0000061		positive	31321	58447	67618	43266	49655	19553	75804	29375	47636
CARNITINE	162.112	6.23	C7H15NO3	161.105	162.113	C00318	6645-46-1		HMDB0000062	34532	positive	1221923	1377442	1109693	1160627	1163422	335	588511	1245	1026365
L-CYS-GLY	179.048	5.5	C5H10N2O3S	178.041	179.048		19246-18-5		HMDB0000078	3305	positive	299	276	449	255	366	60	272	168	234
SN-GLYCEROL-3-PHOSPHOCHOLINE	258.109	6.09	C8H21NO6P	258.11	259.118	C00670	64681-08-9		HMDB0000086		positive	74950	85475	73509	63830	88766	25110	76446	45340	48634
Alanine	90.0542	5.02	C3H7NO2	89.0477	90.0555	C01401	338-69-2	15570	HMDB0000161_x000D_		positive	5093	4619	2549	3947	3892	1790	3557	2185	2907
INOSINE 5'-MONOPHOSPHATE	347.041	6.05	C10H13N4O8P	348.047	347.039	C00130	352195-40-5		HMDB0000175		negative	1397283	2453188	2262748	2115047	2179635	2058691	1831872	1850676	1980374
ACETYLCARNITINE	204.123	13.54	C9H17NO4	203.116	204.123		5080-50-2		HMDB0000201	956	positive	1125341	2974383	2579445	2372750	1640536	416660	1445767	876307	1619422
OLEIC ACID	281.248	27.27	C18H34O2	282.256	281.248				HMDB0000207		negative	64431	73358	88912	83395	67356	70937	32278	44648	77734
PANTOTHENIC ACID	218.104	15.04	C9H17NO5	219.111	218.103		137-08-6		HMDB0000210	241	negative	102868	146666	145887	121868	96392	91801	73739	87742	83018
PALMITIC ACID	255.231	27.03	C16H32O2	256.24	255.232				HMDB0000220		negative	46628	41207	47300	38104	34423	40195	16579	22840	35820
PALMITOYL-L-CARNITINE	400.34	25.71	C23H45NO4	399.335	400.342		2364-67-2		HMDB0000222	961	positive	16289	28492	10101	12933	15551	3915	10332	7030	12002
PHOSPHOENOL PYRUVATE	166.975	5.11	C3H5O6P	167.982	166.975	C00074	5541-93-5		HMDB0000263		negative	4990	18557	8617	13598	13831	7281	8526	7667	3310
5-OXO-L-PROLINE	130.049	5.15	C5H7NO3	129.043	130.05		98-79-3		HMDB0000267	3251	positive	555451	714277	422392	514039	578160	351187	502662	384745	423689
XANTHINE	151.027	11.9	C5H4N4O2	152.033	151.026	C00385	69-89-6	17712	HMDB0000292	82	negative	413699	398814	579068	524668	535601	322115	238856	363065	457889
URIDINE 5'-DIPHOSPHOGALACTOSE	565.046	4.51	C15H24N2O17P2	566.055	565.047	C00052	137868-52-1		HMDB0000302		negative	4388	2738	5633	2344	1641	6622	1804	3435	2124
2-METHYLBUTYROYL CARNITINE	246.169	19.79	C12H23NO4	245.163	246.17			73026	HMDB0000378	5367	positive	7426	9995	16463	11846	10059	4820	10015	6463	8032
1-METHYL-HISTIDINE	170.091	5.49	C7H11N3O2	169.085	170.092		368-16-1		HMDB0000479	3293	positive	10985	11409	7679	8643	9175	1996	6931	3928	5744
PC(16:0/16:0)	734.567	29.31	C40H80NO8P	733.562	734.569				HMDB0000564	39306	positive	16491	29027	107967	20983	31399	21465	132354	112186	31384
ISOBUTYRYL CARNITINE	232.154	18.46	C11H21NO4	231.1471	232.154		25518-49-4		HMDB0000736	34492	positive	57684	35638	120802	66214	81629	37497	57403	75879	56293
SEBACIC ACID	201.114	23.86	C10H18O4	202.12	201.113		111-20-6		HMDB0000792		negative	7650	4206	4115	8319	7227	5507	6521	5574	8968
C18:0-ACYLCARNITINE	428.375	26	C25H49NO4	427.366	428.373				HMDB0000848	46553	positive	5631	8500	4243	5364	5813	1685	3876	3585	5584
L-TRYPTOPHAN	203.083	16.65	C11H12N2O2	204.09	203.082	C00806	153-94-6	16296	HMDB0000929	65364	negative	79682	50205	56078	44515	52545	35221	31034	33938	36625
ARACHIDONIC ACID	303.235	27.39	C20H32O2	304.24	303.233		506-32-1		HMDB0001043	193	negative	303655	300329	213585	354347	226724	42507	171279	144599	491694
ADENOSINE 5'-DIPHOSPHORIBOSE	560.077	5.54	C15H23N5O14P2	559.072	560.079	C00301	68414-18-6		HMDB0001178		positive	277317	453865	335214	257669	360938	130071	333739	170685	118376
GUANOSINE-DIPHOSPHATE	442.019	5.43	C10H15N5O11P2	443.024	442.017		43139-22-6		HMDB0001201	43385	negative	3378	3631	5248	2579	5250	4801	1959	2244	3126
FLAVIN ADENINE DINUCLEOTIDE (FAD)	786.161	20.01	C27H33N9O15P2	785.157	786.165	C00016	84366-81-4		HMDB0001248		positive	51124	60506	57428	60389	65654	19813	54313	16461	51110
SPERMINE	203.223	3.48	C10H26N4	202.216	203.224	C00750	306-67-2		HMDB0001256		positive	63712	74550	67934	54300	59463	32768	133333	33796	30662
SM(d18:1/18:0)	731.604	28.87	C41H83N2O6P	730.599	731.606				HMDB0001348	53979	positive	6359	10052	40727	8194	10326	8817	53160	53458	12501
NIACINAMIDE	123.055	14.06	C6H6N2O	122.048	123.055		98-92-0		HMDB0001406	1497	positive	1555447	1693872	1524021	1973366	1642348	1185339	1699208	1020416	1991286
CYTIDINE 5'-DIPHOSPHOCHOLINE	489.113	6.07	C14H26N4O11P2	489.115	490.122	C00307	33818-15-4		HMDB0001413	3581	positive	14713	14147	13797	10854	10957	3910	13075	7045	10583
PHOSPHOCREATINE	212.043	5.6	C4H10N3O5P	211.036	212.044	C02305	19333-65-4		HMDB0001511		positive	334	998	683	987	281	212	371	504	224
D-RIBOSE 5-PHOSPHATE	229.012	5.03	C5H11O8P	230.019	229.011	C00117	18265-46-8		HMDB0001548		negative	24281	25440	21387	23801	27868	25453	15365	20277	21104
PYRIDOXAMINE-5'-PHOSPHATE	249.061	5.22	C8H13N2O5P	248.0562	249.064		529-96-4		HMDB0001555	236	positive	10920	14921	11448	11850	13480	4398	14620	7462	9183
PHOSPHOCHOLINE	184.072	6.07	C5H14NO4P	183.066	184.074	C00588	72556-74-2		HMDB0001565		positive	107286	129305	112929	107251	116385	40368	100009	72548	84120
RETINOATE	301.14	27.32	C20H28O2	300.209	301.217				HMDB0001852		positive	150459	143235	170933	172114	152441	154639	172578	161558	170880
3-METHYLHISTAMINE	126.102	4.98	C6H11N3	125.095	126.103	C15526	36475-47-5		HMDB0001861		positive	2697	5801	5263	5933	3658	2054	5279	3627	4806
PETROSELINIC ACID	283.264	26.49	C18H34O2	282.256	283.264	no Kegg	-		HMDB0002080		positive	28692	25451	21481	29184	29188	29673	20331	14565	31019
OLEOYL ETHANOOLAMIDE	326.305	26.97	C20H39NO2	325.298	326.305		111-58-0		HMDB0002088	24103	positive	3422	3177	3422	2537	3306	2559	3159	1754	4061
OXIDIZED GLUTATHIONE	613.155	6.17	C20H32N6O12S2	612.152	613.159		27025-41-8		HMDB0003337	45	positive	81365	125565	124119	95189	147306	1995	102183	28751	51467
ADENINE	136.061	10.78	C5H5N5	135.054	136.062	C00147	73-24-5	16708	HMDB00034	85	positive	172999	110042	101443	100834	232884	20975	154905	48502	89353
BETAINE	118.085	7.97	C5H11NO2	117.079	118.087	C00719	107-43-7	17750	HMDB00043	287	positive	96339	68933	98167	191362	60302	4360	26493	5009	180599
ASCORBIC ACID	175.026	6.06	C6H8O6	176.032	175.024	C00072	50-81-7	29073	HMDB00044	249	negative	107	3606	1697	6238	4166	277	251	5120	11467
ADENOSINE 5'-MONOPHOSPHATE	348.069	6.09	C10H14N5O7P	347.063	348.071	C00020	4578-31-8		HMDB00045	72164	positive	550490	419203	543178	459050	499113	200299	487814	326003	316888
ADENOSINE	268.104	13.25	C10H13N5O4	267.097	268.105	C00212	58-61-7	16335	HMDB00050	86	positive	593161	303272	208783	200088	296721	94909	233510	195385	190284
4-HYDROXY-L-PROLINE	132.064	5.25	C5H9NO3	131.058	132.065		2584-71-6		HMDB0006055	64947	positive	7121	12120	9651	11344	12215	2322	8617	5832	7427
12-HETE	319.228	26.7	C20H32O3	320.235	319.228		82337-46-0		HMDB0006111	45653	negative	1366488	833869	1334287	968373	1202561	2059711	182755	631650	346780
C18:1-ACYLCARNITINE	426.356	25.92	C25H47NO4	425.351	426.358				HMDB0006351	58401	positive	11017	15710	6445	9157	9136	1721	5039	3847	7942
CREATINE	132.076	6.08	C4H9N3O2	131.069	132.077	C00300	57-00-1	16919	HMDB00064	7	positive	2465780	3017639	2711066	2617455	2699212	1173508	2378389	1815582	2326441
PC(16:0/18:1)	760.581	29.54	C42H82NO8P	759.578	760.585				HMDB0007971	39325	positive	27305	68853	180248	42479	63120	47763	202513	204143	52763
PC(16:0/18:2)	758.571	29.54	C42H80NO8P	757.562	758.569				HMDB0007973	39327	positive	23233	58097	141533	54906	54877	30873	149270	168089	56115
PC(16:0/18:3)	756.549	29.34	C42H78NO8P	755.547	756.554				HMDB0007974	59612	positive	4167	5600	27935	4171	7108	4705	36662	28022	6677
PC(18:0/18:1)	788.614	29.68	C44H86NO8P	787.609	788.616				HMDB0008037	59549	positive	7280	16549	37056	3332	18304	9591	45511	43721	6412
PC(18:0/20:4)	810.602	29.86	C46H84NO8P	809.593	810.601				HMDB0008048	59877	positive	23707	34305	117866	15634	50581	29258	129775	145886	31253
CYTIDINE	242.081	6.08	C9H13N3O5	243.086	242.078	C00475	65-46-3	17562	HMDB00089	3376	negative	13228	12344	12129	10350	11383	14118	8535	10871	9311
PE(16:0/18:1)	702.541	28.2	C39H76NO7P	701.536	702.543				HMDB0008926	62232	positive	30321	31314	33129	33373	30467	32946	34615	34689	31739
PE (16:0/22:6)	764.521	28.3	C43H74NO8P	763.515	764.522				HMDB0008946	40494	positive	64201	103216	261433	53993	90554	60814	282248	320128	101074
PE(18:0/18:2)	728.556	28.25	C41H78NO7P	727.552	728.559				HMDB0008994	62181	positive	952	2653	4314	185	2370	921	5555	6274	912
PE(18:2/22:6)	788.525	28.45	C45H74NO8P	787.515	788.523				HMDB0009111	61076	positive	12844	19109	41057	16113	16947	10310	37262	44026	23456
CITRATE	191.021	6.3	C6H8O7	192.027	191.019	C00158	77-92-9	30769	HMDB00094	124	negative	4433	4481	3442	3395	3655	4193	2667	2717	3344
5'-CMP	324.058	5.4	C9H14N3O8P	323.052	324.06	C00055	63-37-6	17361	HMDB00095	5143	positive	10843	15037	11140	11396	12400	3621	11277	6408	8417
SM(d18:1/16:0)	703.573	28.62	C39H79N2O6P	702.568	703.575		6254-89-3		HMDB0010169	41586	positive	18644	30408	108964	44845	29966	19318	120037	112471	51824
12-HEPE	317.212	26.6	C20H30O3	318.219	317.212		109430-12-8		HMDB0010202	36343	negative	183705	196128	221623	154255	254869	339958	29107	139366	58686
HODE	295.227	26.43	C18H32O3	296.235	295.228		10075-11-3		HMDB0010223	45660	negative	71766	92261	93224	60648	55871	234965	38976	46371	31093
LysoPC(16:1)	494.323	26.88	C24H48NO7P	493.317	494.324				HMDB0010383	61693	positive	116396	153816	116768	150643	93522	24931	85118	53176	101127
LysoPC(18:0)	524.37	27.46	C26H54NO7P	523.364	524.371				HMDB0010384	61694	positive	1907492	1962460	1981029	2485094	1743878	529676	2162172	1518381	2383677
LysoPC(18:1)	522.354	27.32	C26H52NO7P	521.348	522.355				HMDB0010385	61695	positive	1514718	2021806	1747706	1771772	1148397	326660	1186591	937818	1331199
LysoPC(18:2)	520.338	27.25	C26H50NO7P	519.332	520.34				HMDB0010386	61696	positive	1247408	1799107	1379874	1596264	1086968	271419	1034325	706183	1073782
LysoPC(22:6)	568.337	27.74	C30H50NO7P	567.332	568.34				HMDB0010404	61713	positive	7203320	7860340	5929605	6836423	5239702	1371713	5374225	3376308	6474163
3-HYDROXY-TETRADECANOIC ACID	243.199	26	C14H28O3	244.204	243.197		3422-31-9		HMDB0010731	35541	negative	10205	16470	7790	6880	8751	11928	5677	6727	8056
LysoPE(18:0)	482.325	26.66	C23H48NO7P	481.317	482.324				HMDB0011130	61992	positive	327239	304938	310074	468669	262896	102492	389985	248622	494999
PE (18:0/22:6)	792.551	28.43	C45H78NO8P	791.547	792.554				HMDB0011394	40493	positive	117459	175689	439031	38315	155948	104606	456858	493309	110679
LysoPE(20:4)	502.291	26.65	C25H44NO7P	501.286	502.293				HMDB0011487	62302	positive	238590	251230	160429	265302	177768	60892	173760	94161	226217
LysoPE(22:4)	530.323	26.95	C27H48NO7P	529.317	530.324				HMDB0011493	62281	positive	12017	13223	12963	18440	10252	3255	12624	8506	15955
LysoPE(18:2)	478.291	26.46	C23H44NO7P	477.286	478.293				HMDB0011507	62292	positive	75548	79628	41512	105058	58624	20405	46207	25966	79008
LysoPE(22:6)	526.288	26.83	C27H44NO7P	525.285	526.293				HMDB0011526	62310	positive	2143956	2428909	1926083	2636191	1711793	469901	1881568	1238216	2388424
GLUTATHIONE	308.089	6.32	C10H17N3O6S	307.084	308.092	C00051	70-18-8	16856	HMDB00125	44	positive	524384	826238	514372	508703	516160	73954	432707	253545	526086
GUANOSINE	282.086	11.22	C10H13N5O5	283.092	282.084	C00387	118-00-3	16750	HMDB00133	87	negative	5265	8700	5839	4137	7457	6251	2308	4211	5349
GLUTAMIC ACID (-H2O)	148.061	5.13	C5H9NO4	147.053	148.061	C00302	56-86-0	16015	HMDB00148	19	positive	223285	308255	190673	231046	279967	98490	259665	188412	205087
MALATE	133.016	6.01	C4H6O5	134.022	133.014	C00711	97-67-6	30797	HMDB00156		negative	336516	361845	266373	268291	291858	310261	210911	200565	235321
HYPOXANTHINE	137.044	6.11	C5H4N4O	136.039	137.046	C00262	68-94-0	17368	HMDB00157	83	positive	87970	164878	168130	141230	130915	70100	158076	96988	143805
TYROSINE	182.081	7.32	C9H11NO3	181.074	182.082	C01536	60-18-4	17895	HMDB00158	34	positive	55700	40490	18345	26533	35667	516	16790	2205	22413
L-PHENYLALANINE	166.084	13.41	C9H11NO2	165.079	166.087	C02057	63-91-2	17295	HMDB00159	28	positive	343915	273308	183959	156763	227151	35402	134868	51775	133784
PROLINE	116.07	6.08	C5H9NO2	115.063	116.071	C16435	147-85-3	17203	HMDB00162	29	positive	14183	12121	9855	9860	13402	2141	11587	6018	9620
THREONINE	120.065	5.13	C4H9NO3	119.058	120.066	C00188	72-19-5	16857	HMDB00167	32	positive	8154	6082	3066	4535	6635	2449	4724	2672	3902
ISOLEUCINE	132.101	8.47	C6H13NO2	131.095	132.102	C16434	73-32-5	17191	HMDB00172	23	positive	267728	132584	52116	86921	138467	5580	31900	12075	80609
MALEIC ACID	115.004	6.04	C4H4O4	116.011	115.003	C01384	110-16-7	18300	HMDB00176	4189	negative	38734	42565	30798	29992	33609	36811	24168	23214	25972
HISTIDINE	156.076	4.87	C6H9N3O2	155.069	156.077	C00768	C6H9N3O2	15971	HMDB00177	21	positive	7878	9345	6998	7165	8400	4320	6746	4965	6151
LYSINE	147.111	4.52	C6H14N2O2	146.106	147.113	C16440	56-87-1	18019	HMDB00182	25	positive	4660	5198	3612	3162	4707	2614	4532	2663	2962
D-LACTIC ACID	89.0263	6.88	C3H6O3	90.0317	89.0239	C01432	79-33-4	422	HMDB00190		negative	538289	700536	817480	633513	817452	499822	257055	367420	535109
ASPARTATE	132.03	4.97	C4H7NO4	133.038	132.03	C16433	56-84-8	17053	HMDB00191	15	negative	17176	11715	7273	9626	7562	11424	5792	5770	7710
INOSINE	269.087	11.68	C10H12N4O5	268.081	269.089	C00294	58-63-9	17596	HMDB00195	84	positive	176650	311498	165813	218677	204901	20619	131041	50250	182154
N-ACETYLNEURAMINATE	308.099	5.47	C11H19NO9	309.106	308.098	C00270	131-48-6	17012	HMDB00230	24101	negative	12526	16504	11714	11796	12859	13134	7429	8673	9125
TAURINE	124.009	5.01	C2H7NO3S	125.015	124.007	C00245	107-35-7	15891	HMDB00251	31	negative	733952	1020602	794990	906647	814382	887194	554546	650382	772948
URIDINE-5-MONOPHOSPHATE	323.028	5.53	C9H13N2O9P	324.036	323.028	C00105	58-97-9	16695	HMDB00288	3453	negative	61749	116945	81749	78194	83846	84177	57388	57511	46892
URATE	167.021	6.75	C5H4N4O3	168.028	167.021	C00366	69-93-2	17775	HMDB00289	88	negative	13569	25802	22969	20815	26536	22761	10790	15667	12718
L-AMINOCYCLOPROPANE-1-CARBOXYLATE	102.054	5.16	C4H7NO2	101.048	102.055	C01234	22059-21-8	18053	HMDB0036458	6029	positive	16361	19372	12269	14112	18565	6585	16879	11825	12861
ALLANTOIN	157.038	5.67	C4H6N4O3	158.044	157.036	C01551	97-59-6	15676	HMDB00462	89	negative	7616	7760	6643	5627	8914	8827	2817	4192	6652
ARGININE	175.118	4.88	C6H14N4O2	174.112	175.119	C00062	74-79-3	16467	HMDB00517	5502	positive	38646	36576	22509	19686	37613	10195	24715	13211	18651
CREATININE	114.065	6.04	C4H7N3O	113.059	114.067	C00791	60-27-5	16737	HMDB00562	8	positive	27515	38305	31343	27502	30948	5812	25596	12227	26249
CYSTEINE	122.025	5.32	C3H7NO2S	121.02	122.028	C00736	52-90-4	17561	HMDB00574	63299	positive	937	1041	508	454	800	160	642	495	577
GLUCONIC ACID	195.05	5.15	C6H12O7	196.058	195.05	C00257	526-95-4	33198	HMDB00625	345	negative	7333	8623	6739	6551	7311	7159	6652	6078	5193
PROPANOYL CARNITINE	218.139	16.01	C10H19NO4	217.131	218.1387				HMDB0062514	85176	positive	20953	15702	24107	24965	19376	14504	20984	26770	37623
2-HYDROXY STEARIC ACID	299.26	26.47	C18H36O3	300.266	299.259		629-22-1		HMDB0062549	35432	negative	304938	271449	317331	317909	313003	307722	291856	231206	351296
N-METHYL-L-GLUTAMATE	162.075	5.48	C6H11NO4	161.069	162.077	C01046	35989-16-3	16440	HMDB0062660	44791	positive	1920	2296	1601	1903	2162	520	1857	1056	1048
CYTOSINE	112.05	6.05	C4H5N3O	111.043	112.051	C00380	71-30-7	16040	HMDB00630	283	positive	5395	7200	5791	5918	5300	2727	5289	3551	4765
GLUTAMINE	147.075	5.15	C5H10N2O3	146.069	147.077	C00303	56-85-9	18050	HMDB00641	18	positive	386577	497979	284315	356790	380546	258606	332840	256915	278035
METHIONINE	150.057	7.46	C5H11NO2S	149.051	150.059	C01733	63-68-3	16643	HMDB00696	26	positive	46956	49691	31996	41318	41337	10902	29429	14365	28031
N-ACETYL-L-ALANINE	130.052	7.58	C5H9NO3	131.058	130.05	no Kegg	97-69-8	40992	HMDB00766	5733	negative	280	468	268	396	276	248	312	652	436
N-ACETYLASPARTATE	174.041	7.61	C6H9NO5	175.048	174.04	C01042	997-55-7	21547	HMDB00812	5776	negative	6089	9038	5334	7561	5269	6409	5508	9738	5747
CITRULLINE	176.101	5.37	C6H13N3O3	175.096	176.103	C00327	372-75-8	16349	HMDB00904	16	positive	37871	50288	31886	34297	53003	20107	36921	22748	29566
S-ADENOSYLHOMOCYSTEINE	383.116	12.37	C14H20N6O5S	384.122	383.114	C00021	979-92-0	16680	HMDB00939	296	negative	15836	21984	20995	32284	19071	17645	15168	15245	22028
FRUCTOSE 1,6-BIPHOSPHATE	338.988	4.31	C6H14O12P2	339.996	338.988	C00354	488-69-7	16905	HMDB01058	147	negative	5163	31063	9470	35561	33390	10277	15864	8112	9484
SPERMIDINE	146.165	3.75	C7H19N3	145.158	146.166	C00315	124-20-9	16610	HMDB01257	254	positive	79018	69204	70304	71744	64716	31241	109296	37109	40058
GUANOSINE 5'-MONOPHOSPHATE	364.065	6.06	C10H14N5O8P	363.058	364.066	C00144	5550-12-9		HMDB01397		positive	29818	39151	43659	33951	39223	19277	40365	27001	28656
3-AMINOISOBUTANOATE	104.07	5.27	C4H9NO2	103.063	104.071	C05145	144-90-1		HMDB03911	480	positive	1870	4310	2426	2008	2682	638	2126	1554	2405
16-HYDROXYHEXADECANOIC ACID	271.229	26.12	C10H20O3			C02774	1679-53-4	17409	HMDB06294		negative	62623	70055	60877	55079	60915	62989	56127	57030	59510
N-ARACHIDONYL TAURINE	410.237	26.38	C22H37NO4S	411.244	410.237				N/A	44906	negative	982	1842	1570	893	1083	1381	738	883	910
PE(18:0/18:1)	744.55	28.23	C41H80NO8P	745.562	746.569				N/A	40698	positive	4572	8134	24620	2144	5852	5536	27501	28608	3719
PALATINOSE	341.109	5.35	C12H22O11	342.116	341.108	C01742	NA	N/A	N/A	65642	negative	7648	17546	9612	16339	14677	8349	23157	8577	9869
LysoPS(18:1)	522.286	26.42	C24H46NO9P	523.291	522.284				N/A	40829	negative	11396	13243	9069	8766	9748	10658	5319	7228	8043
BIS(2-ETHYLHEXYL)PHTHALATE	391.281	28.4	C24H38O4	390.277	391.285	C01829	51-48-9	18332	N/A	439	positive	13566	12491	13108	15891	13242	13009	13166	15698	18404
N-STEAROYL TAURINE	390.27	26.47	C20H41NO4S	391.276	390.268		63155-80-6		N/A	44909	negative	14946	24644	15125	10913	13075	15497	10274	12009	11580
LYSOPE(18:1)	480.307	26.55	C23H46NO7P	479.301	480.308				N/A	62291	positive	160330	150906	112205	213185	118783	39020	107512	69243	181264
LysoPG(16:0)	483.274	26.07	C22H45O9P	484.28	483.273				N/A	40874	negative	334100	404229	365707	343186	309398	273179	134616	266880	292185
5(S)-HETE LACTONE	303.231	26.72	C20H30O2	302.225	303.232		127708-42-3		N/A	45647	positive	755535	574527	827000	518610	1272811	52346	592164	288698	185847
LysoPC(16:0)	496.338	27.05	C24H50NO7P	495.332	496.34				N/A	61692	positive	4709922	5522135	4893861	5033452	4457678	1083707	4325416	3126173	4117501
10-HYDROXY CAPRIC ACID	187.135	24.58	C10H20O3	188.141	187.134				none	35414	negative	8320	13279	4390	3521	7018	8688	4518	3792	5799
